# Supplementary material for: Angiogenesis–osteogenesis coupling and immunomodulatory CGRP@nano MOF-loaded CMCS/GelMA hydrogel for bone regeneration
Source: Royal Society of Chemistry journal article supplement (doi:10.1039/d5tb00113g), 2025-01-01
Supplement: d5tb00113g1.pdf [file d5tb00113g1.pdf]

# **Angiogenesis-Osteogenesis Coupling and Immunomodulatory CGRP@Nano MOF-Loaded CMCS/GelMA Hydrogel for Bone Regeneration**

Rong Luo<sup>1,†</sup>, Zhao Chen<sup>1,†</sup>, Man Zhe<sup>2</sup>, Wenting Wu<sup>3</sup>, Yuzhen Xiao<sup>4</sup>, Jiabao Jiang<sup>1</sup>, Hao Liu<sup>1</sup>, Ming Liu<sup>1</sup>, and Fei Xing<sup>3,\*</sup>

<sup>1</sup>Department of Orthopedics, Orthopedic Research Institute, West China Hospital, Sichuan University, 610041 Chengdu, China.

<sup>2</sup>Animal Experiment Center, West China Hospital, Sichuan University, Chengdu 610041, China.

<sup>3</sup>Department of Pediatric Surgery, Division of Orthopedic Surgery, Orthopedic Research Institute, Laboratory of Stem Cell and Tissue Engineering, State Key Laboratory of Biotherapy, West China School of Medicine, West China Hospital, Sichuan University, Chengdu 610041, China.

<sup>4</sup>Institute of Basic Medical Sciences, School of Basic Medicine, Chinese Academy of Medical Sciences & Peking Union Medical College, Beijing 100005, China

<sup>†</sup>These authors have contributed equally to this work and share first authorship.

\*Corresponding author

## **Preparation and characterization of GelMA**

The synthesis of GelMA was conducted following established protocols. Briefly, 5 g of gelatin was dissolved in 50 mL of phosphate-buffered saline (PBS). At 50 °C, 4 mL of methacrylic anhydride was slowly added to the gelatin solution while stirring magnetically for 3 hours. The reaction was subsequently terminated by adding 200 mL of pre-warmed PBS. The resulting solution underwent continuous dialysis at 40 °C for 7 days, after which the product was freeze-dried to obtain GelMA. Characterization of GelMA and gelatin was performed using a Bruker Avance 600 MHz nuclear magnetic resonance (NMR) spectrometer to obtain the <sup>1</sup>H-NMR spectra. The degree of functionalization (DOF) of GelMA was quantified using a ninhydrin colorimetric assay. A series of

standard glycine solutions of known concentrations were prepared and reacted with the ninhydrin working solution. The optical density (OD) at 570 nm was measured using a microplate reader to create a standard curve correlating amino group concentration with absorbance.

Subsequently, gradients of gelatin and GelMA solutions were prepared. Following the same procedure, the OD values were measured, and the amino group concentrations of gelatin (C1) and GelMA (C2) were calculated based on the standard curve. The degree of functionalization of GelMA was then calculated with the equation:

$$DOF = \left(1 - \frac{C2}{C1}\right) \times 100\%$$

### **Preparation of nanoparticles ZIF-8 and CGRP@MOF**

To synthesize ZIF-8, 0.4 g of  $\text{Zn}(\text{NO}_3)_2 \cdot 6\text{H}_2\text{O}$  and 2.76 g of 2-methylimidazole were each dissolved in 10 mL of ddH<sub>2</sub>O to prepare the respective  $\text{Zn}(\text{NO}_3)_2 \cdot 6\text{H}_2\text{O}$  and 2-methylimidazole solutions. The two solutions were then mixed rapidly and stirred magnetically for 3 minutes. Following this, the mixture was centrifuged at 14,000 rpm for 20 min to collect the precipitate. The resulting precipitate was thoroughly washed and dried to yield ZIF-8.

For the synthesis of CGRP@MOF, 10 mg of CGRP and 1.38 g of 2-methylimidazole were dissolved in 10 mL of ddH<sub>2</sub>O. Concurrently, 0.2 g of  $\text{Zn}(\text{NO}_3)_2 \cdot 6\text{H}_2\text{O}$  was dissolved in another 10 mL of ddH<sub>2</sub>O. The two solutions were then mixed to facilitate a complete reaction, followed by centrifugation of the resultant mixture. The precipitated product was subsequently dried to yield CGRP@MOF.

**Table S1.** Gene primer sequences for MC3T3-E1 cells

| Name   |   | Sequences (5' to 3')    |
|--------|---|-------------------------|
| ALP    | F | CCAACTCTTTTGTGCCAGAGA   |
|        | R | GGCTACATTGGTGTTGAGCTTTT |
| Runx2  | F | GACTGTGGTTACCGTCATGGC   |
|        | R | ACTTGGTTTTTCATAACAGCGGA |
| BMP2   | F | CGCCTCACAAACAACCACAG    |
|        | R | AATGACTCGGTTGGTCTCGG    |
| OCN    | F | TGAGAGCCCTCACACTCCTC    |
|        | R | CGCCTGGGTCTCTTCACTAC    |
| COL1A1 | F | GAGAGCATGACCGATGGATT    |
|        | R | CCTTCTTGAGGTTGCCAGTC    |
| GAPDH  | F | AGGTCGGTGTGAACGGATTTG   |
|        | R | TGTAGACCATGTAGTTGAGGTCA |

**Table S2.** Gene primer sequences for RAW264.7 cells

| Name  |   | Sequences (5' to 3')    |
|-------|---|-------------------------|
| iNOS  | F | AGCGCTCTAGTGAAGCAAAG    |
|       | R | CATACTGTGGACGGGTCGATG   |
| Arg1  | F | TTGTGAAGAACCCACGGTCT    |
|       | R | AGATGCTTCCAAGTCCAGA     |
| CD206 | F | ACCTGGGGACCTGGTTGTAT    |
|       | R | ATGGCACTTAGAGCGTCCAC    |
| GAPDH | F | AGGTCGGTGTGAACGGATTTG   |
|       | R | TGTAGACCATGTAGTTGAGGTCA |

**Table S3.** Gene primer sequences for HUVECs

| Name           |   | Sequences (5' to 3')   |
|----------------|---|------------------------|
| VEGF           | F | TGCGGATCAAACCTCACCA    |
|                | R | CAGGGATTTTTCTTGTCTTGCT |
| HIF-1 $\alpha$ | F | CCATGTGACCATGAGGAAAT   |
|                | R | CGGCTAGTTAGGGTACACTT   |
| NOTCH1         | F | GACTGCTCCCTCAACTTCAAT  |
|                | R | GTGGTCCTGCAGTACTGGT    |
| GAPDH          | F | GATTTGGTCGTATTGGGCG    |
|                | R | CTGGAAGATGGTGATGG      |

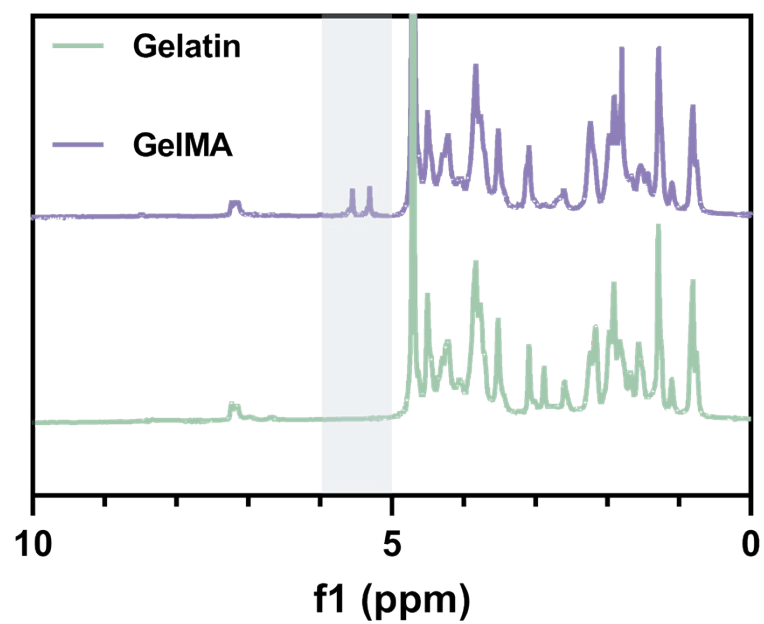

**Figure S1:** <sup>1</sup>H-NMR spectral of GelMA and gelatin.

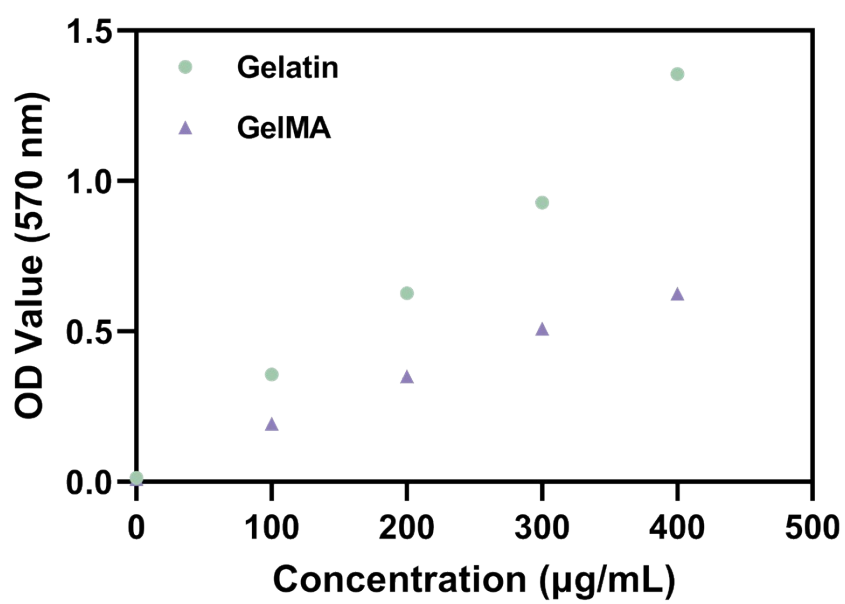

**Figure S2:** Assessment of the degree of functionalization for GelMA.

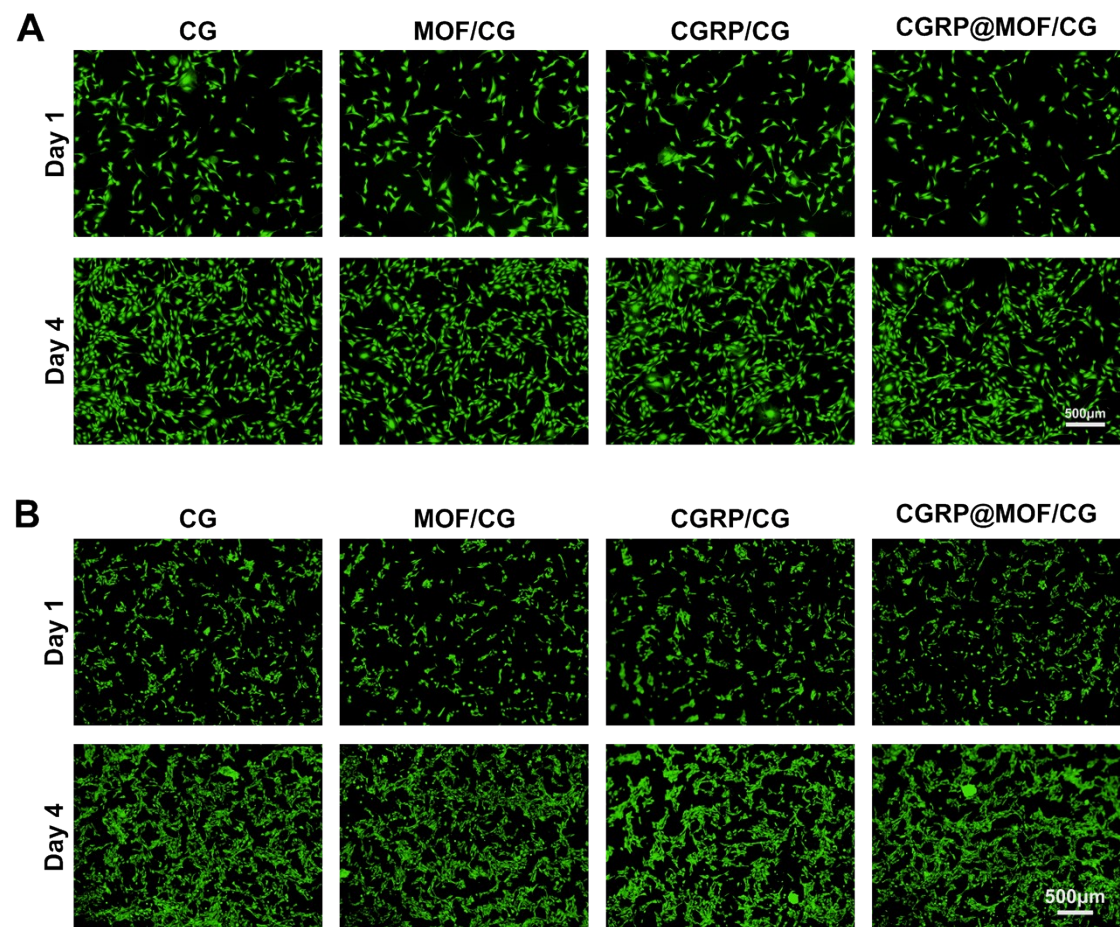

**Figure S3:** (A) Calcein-AM/PI staining of MC3T3-E1 cells co-cultured with different hydrogels in a non-contact manner for 1 and 4 days. (B) Calcein-AM/PI staining of MC3T3-E1 cells co-cultured with different hydrogels in a contact manner for 1 and 4 days.

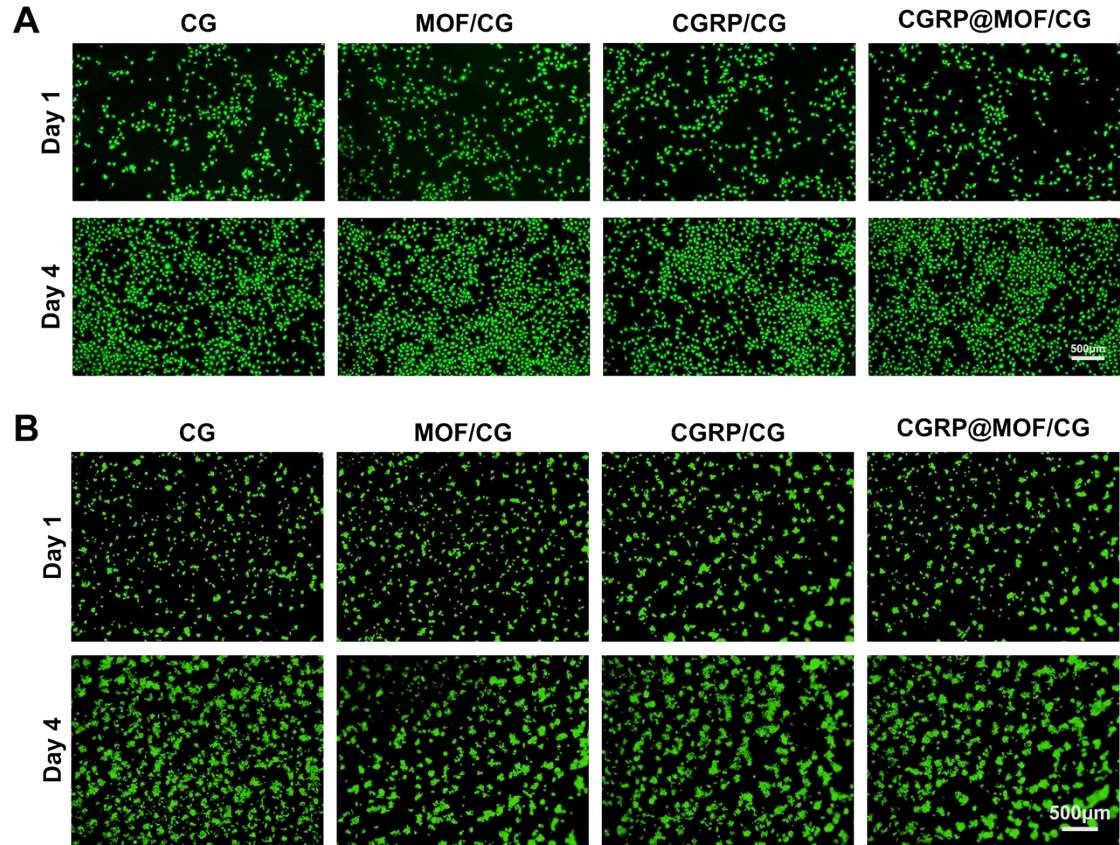

**Figure S4:** (A) Calcein-AM/PI staining of HUVECs co-cultured with different hydrogels in a non-contact manner for 1 and 4 days. (B) Calcein-AM/PI staining of HUVECs co-cultured with different hydrogels in a contact manner for 1 and 4 days.



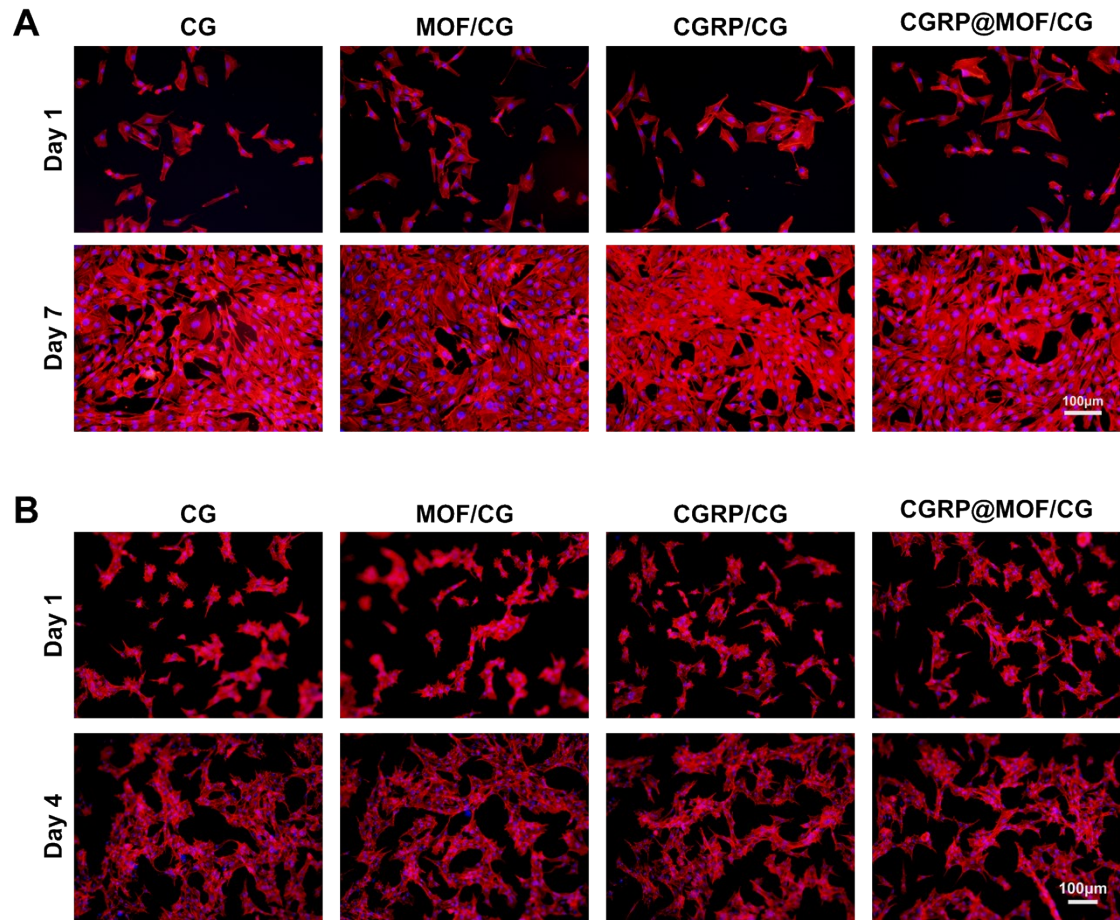

**Figure S5:** (A) Cytoskeletal staining of MC3T3-E1 cells co-cultured with different hydrogels in a non-contact manner for 1 and 7 days. (B) Cytoskeletal staining of MC3T3-E1 cells co-cultured with different hydrogels in a contact manner for 1 and 4 days.

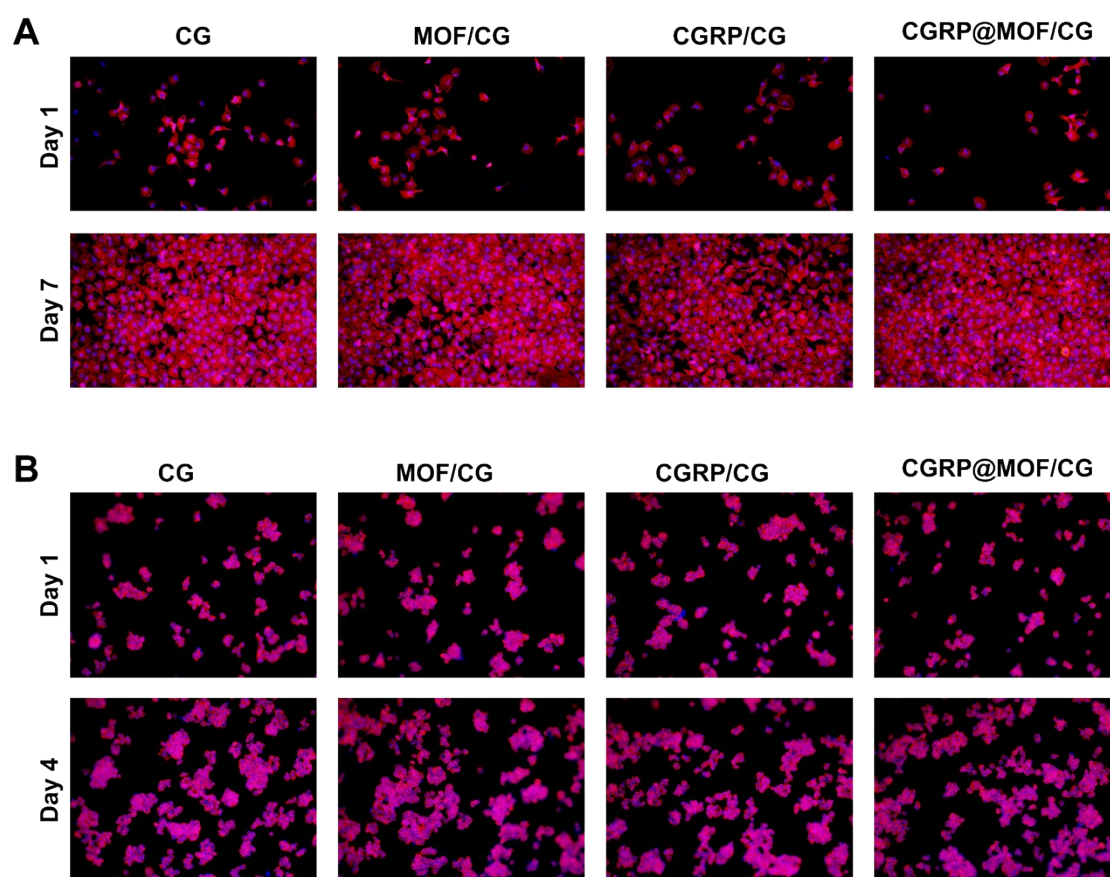

**Figure S6:** (A) Cytoskeletal staining of HUVECs co-cultured with different hydrogels in a non-contact manner for 1 and 7 days. (B) Cytoskeletal staining of HUVECs co-cultured with different hydrogels in a contact manner for 1 and 4 days.

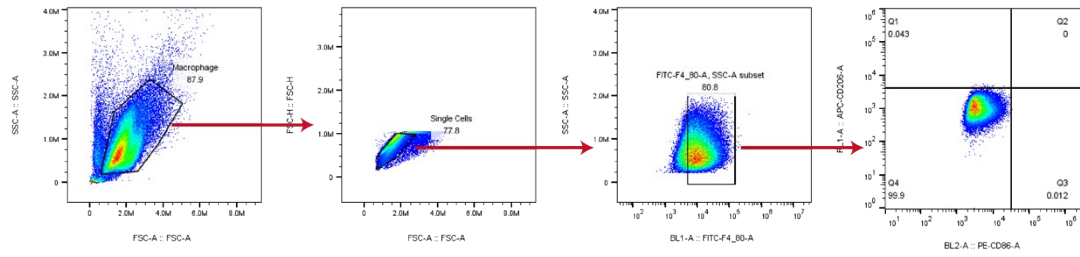

**Figure S7:** Flow cytometry gating strategy.

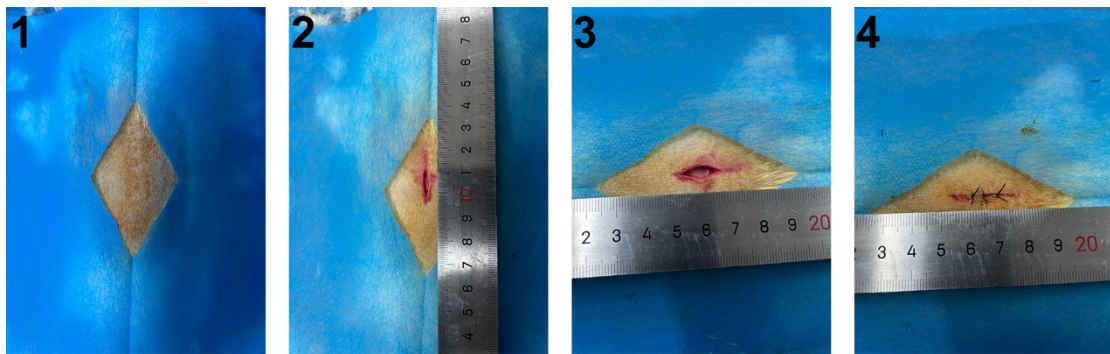

**Figure S8:** Surgical procedure for establishing a subcutaneous implantation model in rats.

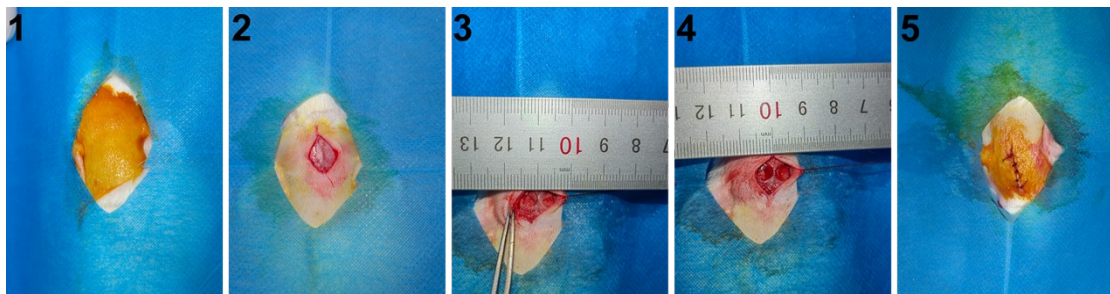

**Figure S9:** Surgical procedure for establishing a cranial defect model in rats.



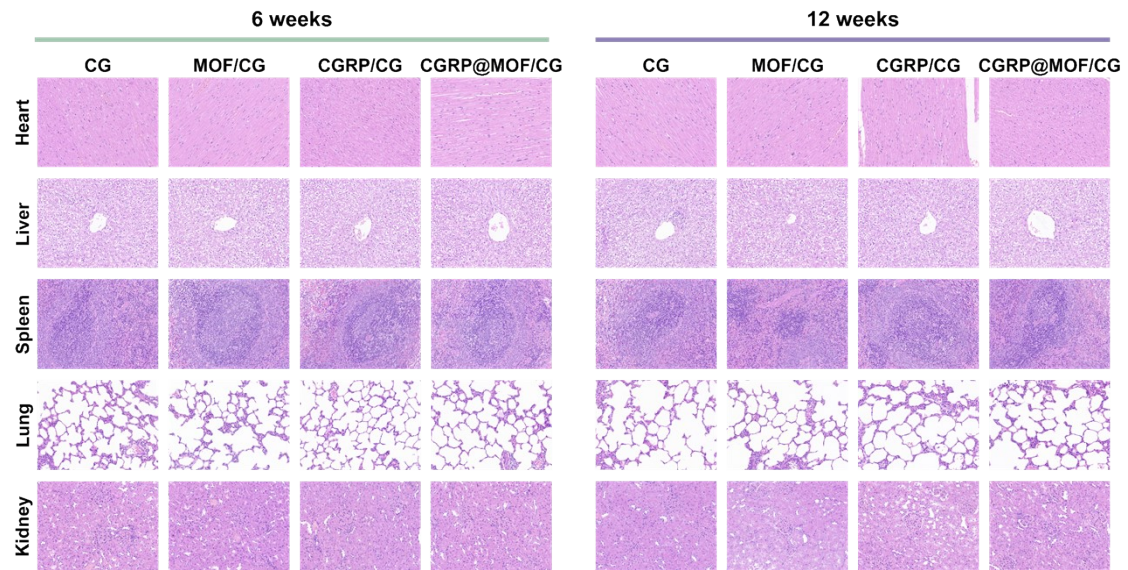

**Figure S10:** H&E staining of vital organs from rats treated with different hydrogels.

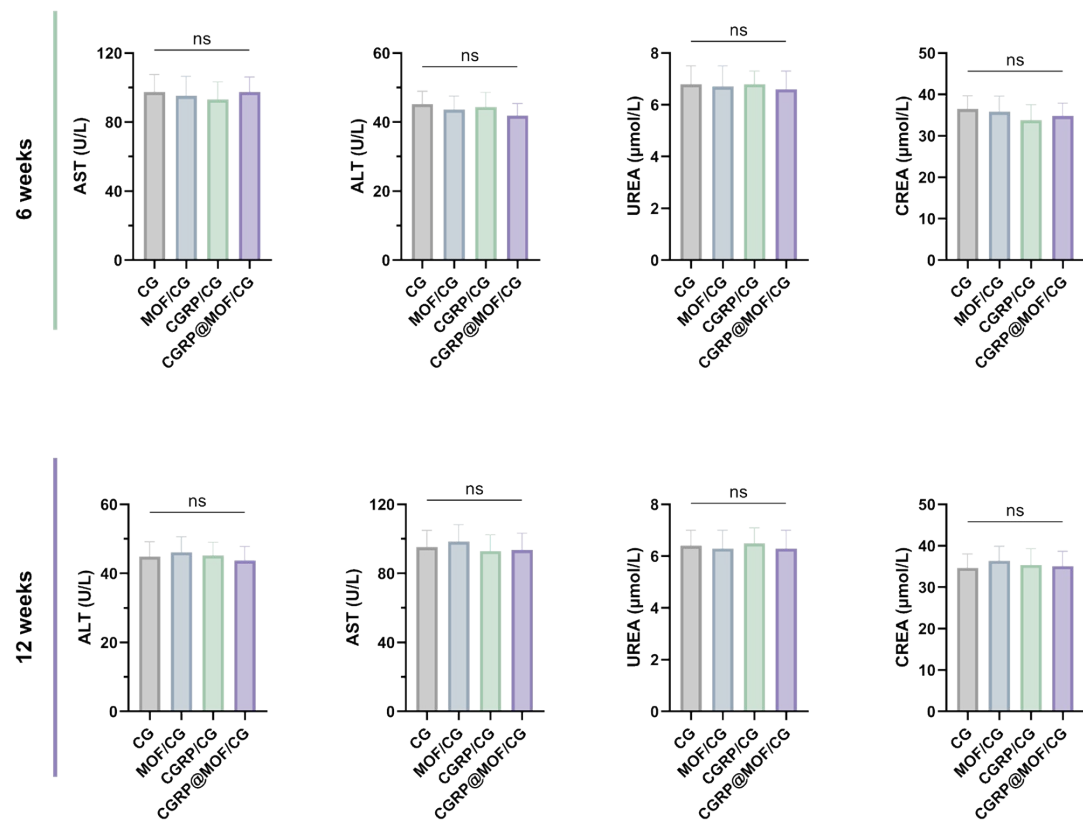

**Figure S11:** Biochemical results of blood samples of rats from different hydrogel groups at 6 and 12 weeks post-implantation.
